# Supplementary material for: FIP200 restricts RNA virus infection by facilitating RIG-I activation
Source: PubMed Central journal article supplement (PMC8322336; doi:10.1038/s42003-021-02450-1), 2021-07-29
Supplement: 42003_2021_2450_MOESM2_ESM.pdf [file 42003_2021_2450_MOESM2_ESM.pdf]

1 **Supplemental Figure Legends**

2 **Suppl. Fig. 1. FIP200 co-localizes and interacts with RIG-I.** (a) The outline of AP-MS. (b)  
3 FIP200 and the high confidence candidate interacting proteins (HCIP) are shown as square and  
4 circles, respectively. The blue line indicates a previously known interaction, and the red line  
5 indicates a new interaction. The arrow indicates RIG-I. (c) FIP200-FLAG was co-transfected  
6 with RIG-I-HA into HEK293 cells. After 48 h, cell lysates were immunoprecipitated with an anti-  
7 FLAG antibody and blotted as indicated. (d) FIP200-FLAG and RIG-I-HA were transfected into  
8 A549 cells. After 48 h, cells were fixed and stained as indicated. FLAG: red; HA: green; DAPI,  
9 blue. Bar = 10  $\mu$ M. (e) A549 cells were transfected with 1  $\mu$ g ml<sup>-1</sup> poly(I:C). Two hours later, cells  
10 were treated Mitotracker Red for 15 min followed by fixation. The proximity ligation assays were  
11 performed. Green: PLA signal; red: mitochondrial tracker; blue: a nuclear stain. Arrows indicate  
12 PLA signals in the mitochondria. Bar = 10  $\mu$ M. (f) FIP200-HA was co-transfected with FLAG-  
13 tagged MDA5 and the indicated mutants into HEK293 cells. After 48 h, cell lysates were  
14 immunoprecipitated with an anti-FLAG antibody and blotted as indicated. (g) The Myc-tagged  
15 2CARD (2CARD-Myc) was transfected with vector, FIP200-FLAG, or FLAG-tagged ATG  
16 domain into HEK293 cells. After 48 h, cell lysates were immunoprecipitated with an anti-FLAG  
17 antibody and blotted as indicated. The arrowhead indicates FLAG-tagged ATG. The arrow  
18 indicates a possible SDS-resistant dimer of ATG. (h) Purified recombinant His-tagged ATG  
19 domain of FIP200 was mixed with GST, 2CARD-GST *in vitro* at 4 °C for 16 h. Then, His  
20 pulldown assay was performed and blotted as indicated.

21

22 **Suppl. Fig. 2. FIP200 is required for RIG-I signaling in fibroblasts.** (a) The cell lysates of  
23 *Fip200<sup>ff</sup>* and *Fip200<sup>-/-</sup>* MEFs were blotted as indicated. (b) MTT assays of *Fip200<sup>ff</sup>* and *Fip200<sup>-/-</sup>*  
24 MEFs. All experiments were biologically repeated three times. Data represent means  $\pm$  s.d. of  
25 three independent experiments. (c) *Fip200<sup>ff</sup>* and *Fip200<sup>-/-</sup>* MEFs were transfected with the

26 indicated amount of poly(I:C). After 16 h, The supernatants were collected for IFN $\alpha$  ELISA  
27 assays. All experiments were biologically repeated three times. Data represent means  $\pm$  s.d. of  
28 three independent experiments. The  $P$  value was calculated (two-tailed Student's  $t$ -test) by  
29 comparison with the *Fip200<sup>fl/fl</sup>* cells. \* $P$  < 0.05, \*\*\* $P$  < 0.001. (d) *Fip200<sup>fl/fl</sup>* and *Fip200<sup>-/-</sup>* MEFs were  
30 transfected with 1  $\mu$ g ml<sup>-1</sup> of poly(I:C) for the designated times. The supernatants were collected  
31 for IFN $\beta$  ELISA assays. All experiments were biologically repeated three times. Data represent  
32 means  $\pm$  s.d. of three independent experiments. The  $P$  value was calculated (two-tailed  
33 Student's  $t$ -test) by comparison with the *Fip200<sup>fl/fl</sup>* cells. \* $P$  < 0.05. (e-f) *Fip200<sup>fl/fl</sup>* and *Fip200<sup>-/-</sup>*  
34 MEFs were stimulated with 1  $\mu$ g ml<sup>-1</sup> poly(I:C) for indicated times. Real-time PCR was  
35 performed to determine the relative mRNA levels of IFN $\beta$  (e) and IRF7 (f). All experiments were  
36 biologically repeated three times. Data represent means  $\pm$  s.d. of three independent  
37 experiments. The  $P$  value was calculated (two-tailed Student's  $t$ -test) by comparison with the  
38 *Fip200<sup>fl/fl</sup>* cells. \* $P$  < 0.05, \*\* $P$  < 0.01. (g) MTT assays of HEK293 and two indicated FIP200  
39 knockout cell lines. All experiments were biologically repeated three times. Data represent  
40 means  $\pm$  s.d. of three independent experiments. (h) The cell lysates of HEK293 and two FIP200  
41 knockout cell lines were blotted as indicated. (i-j) Wild type and FIP200 knockout HEK293 cells  
42 were stimulated with 1  $\mu$ g ml<sup>-1</sup> poly(I:C) for indicated times. Real-time PCR was performed to  
43 determine the relative mRNA levels of OASL (i) and IFIT1 (j). All experiments were biologically  
44 repeated three times. Data represent means  $\pm$  s.d. of three independent experiments. The  $P$   
45 value was calculated (two-tailed Student's  $t$ -test) by comparison with wild type cells. \* $P$  < 0.05.

46

47 **Suppl. Fig. 3. FIP200 is essential for RIG-I signaling in macrophages.** (a) The cell lysates of  
48 wild type and FIP200 knockout RAW 264.7 macrophages were blotted as indicated. (b) MTT  
49 assays of wild type and FIP200 knockout RAW 264.7 macrophages. All experiments were  
50 biologically repeated three times. Data represent means  $\pm$  s.d. of three independent

51 experiments. **(c-d)** Wild type and FIP200 knockout RAW264.7 macrophages were stimulated  
52 with the indicated amount of high molecular weight poly(I:C) (c) or poly(A:U) (d). After 16 h, the  
53 supernatants were collected for IFN $\beta$  ELISA assays. All experiments were biologically repeated  
54 three times. Data represent means  $\pm$  s.d. of three independent experiments. The *P* value was  
55 calculated (two-tailed Student's *t*-test) by comparison with wild type cells. \**P* < 0.05, \*\**P* < 0.01.  
56 **(e)** Wild type and FIP200 knockout RAW 264.7 macrophages were infected with 1 MOI of IAV  
57 delINS1. After 16 h, the supernatants were collected for IFN $\beta$  ELISA assays. All experiments  
58 were biologically repeated three times. Data represent means  $\pm$  s.d. of three independent  
59 experiments. The *P* value was calculated (two-tailed Student's *t*-test) by comparison with wild  
60 type cells. \*\**P* < 0.01.

61

62 **Suppl. Fig. 4. The autophagy function is dispensable for FIP200-mediated RIG-I activation.**

63 **(a-b)** Wild type HEK293 cells, FIP200 knockout cells reconstituted with full-length FIP200,  
64 delATG, or delClaw were stimulated with 1  $\mu\text{g ml}^{-1}$  poly(I:C) for designated times. Real-time  
65 PCR was performed to determine the relative mRNA levels of IP10 (a) and RANTES (b). All  
66 experiments were biologically repeated three times. Data represent means  $\pm$  s.d. of three  
67 independent experiments. The *P* value was calculated (two-tailed Student's *t*-test) by  
68 comparison with HEK293 cells. \**P* < 0.05, \*\**P* < 0.01. **(c)** Two hundred ng of FLAG-tagged  
69 FIP200, FIP200-4A, or ULK1 was transfected with 20 ng of FLAG-tagged RIG-I and 20 ng of  
70 pRL-SV40, together with 200 ng of pISRE-Luc or NF- $\kappa$ B-Luc into HEK293 cells. After 48 h, cells  
71 were collected and the ratio of firefly luciferase to *Renilla* luciferase was calculated to determine  
72 the relative activity of IFN reporter. All experiments were biologically repeated three times. Data  
73 represent means  $\pm$  s.d. of three independent experiments. The *P* value was calculated (two-  
74 tailed Student's *t*-test) by comparison with the RIG-I/vector transfection. \**P* < 0.05, \*\**P* < 0.01.

75

76 **Suppl. Fig. 5. FIP200 limits RNA virus infection.** (a) FIP200 wild type and knockout HEK293  
77 cells were infected with VSV-Luc for 16 h. Luciferase activity was measured to determine  
78 relative viral infection activity. All experiments were biologically repeated three times. Data  
79 represent means  $\pm$  s.d. of three independent experiments. The  $P$  value was calculated (two-  
80 tailed Student's  $t$ -test) by comparison with wild type cells.  $*P < 0.05$ ,  $**P < 0.01$ . (b) *Fip200<sup>ff</sup>* and  
81 *Fip200<sup>-/-</sup>* MEFs were infected with the VSV carrying a GFP gene (VSV-GFP) for 16 h. The  
82 relative infection was determined by the ratio of GFP positive cells and summarized in the right  
83 panel. Bar = 50  $\mu$ M. Data represent means  $\pm$  s.d. of three independent experiments. The  $P$   
84 value was calculated (two-tailed Student's  $t$ -test) by comparison with the wild type cells.  $*P <$   
85 0.05. (c) Wild type and FIP200 knockout RAW264.7 macrophages were infected with  
86 designated amounts of VSV. After 16 h, cell lysates were collected and blotted as indicated. (d)  
87 ATG5 wild type and knockout MEFs were infected with VSV-GFP for 16 h. The relative infection  
88 was determined by the ratio of GFP positive cells and summarized in the right panel. Bar = 50  
89  $\mu$ M. Data represent means  $\pm$  s.d. of three independent experiments. The  $P$  value was calculated  
90 (two-tailed Student's  $t$ -test) by comparison with the wild type cells.  $*P < 0.05$ . (e) Wild type  
91 HEK293 cells, FIP200 knockout cells, and FIP200 knockout cells reconstituted with full-length  
92 FIP200 or the 4A mutant were infected with 0.1 MOI of VSV-Luc for 16 h. Luciferase activity  
93 was measured to determine relative viral infection activity. Data represent means  $\pm$  s.d. of three  
94 independent experiments. The  $P$  value was calculated (two-tailed Student's  $t$ -test) by  
95 comparison with the wild type cells.  $**P < 0.01$ . (f) Wild type and FIP200 knockout RAW264.7  
96 macrophages were infected with VACV-Luc for 16 h. Luciferase activity was measured to  
97 determine relative viral infection activity. Data represent means  $\pm$  s.d. of three independent  
98 experiments.

99

100 **Suppl. Fig. 6. FIP200 is required for RIG-I signaling and host defense *in vivo*.** (a-b) The



101 BMDMs of *Fip200<sup>ff</sup>* and *Fip200<sup>ff</sup>;LysM-Cre* mice were stimulated with 1  $\mu\text{g ml}^{-1}$  of poly(I:C) for  
102 indicated times. Real-time PCR was performed to determine the relative mRNA levels of IP10 (a)  
103 and RANTES (b). Data represent means  $\pm$  s.d. of three independent experiments. The *P* value  
104 was calculated (two-tailed Student's *t*-test) by comparison with the wild type cells. \**P* < 0.05, \*\**P*  
105 < 0.01. (c) Histomicrographs comparing pulmonary lesions between *Fip200<sup>ff</sup>* and  
106 *Fip200<sup>ff</sup>;LysM-Cre* mice 7 d after VSV infection. *Fip200<sup>ff</sup>;LysM-Cre* mouse exhibited a marked  
107 diffuse interstitial pneumonia whereas lung tissue obtained from *Fip200<sup>ff</sup>* mouse was essentially  
108 normal. Arrows point to regions of vasculitis with lymphocyte infiltrate. Bar = 100  $\mu\text{M}$ .

109

110 **Suppl. Fig. 7. FIP200 regulates the release and oligomerization of 2CARD.** (a) Purified  
111 recombinant Hel-CTD-FLAG was mixed with GST, 2CARD-GST or 2CARD-GST plus ATG-His  
112 at 4 °C. After 16 h, GST pull-down assay was performed. Arrow indicates the 2CARD-GST.  
113 Arrowhead indicates the cleaved GST from 2CARD-GST during extraction and purification from  
114 *E. coli*. (b) HA-tagged ubiquitin (Ub-HA), GFP-tagged FIP200 (FIP200-GFP), and RIG-I-FLAG  
115 were transfected into HEK293 cells in the indicated combinations. After 48 h, cell lysates were  
116 immunoprecipitated and blotted as indicated. (c) FIP200 wild type and knockout HEK293 cells  
117 were transfected with RIG-I-FLAG and Ub-HA. After 48 h, cell lysates were immunoprecipitated  
118 and blotted as indicated. (d) *Fip200<sup>ff</sup>* and *Fip200<sup>-/-</sup>* MEFs were stimulated with 1  $\mu\text{g ml}^{-1}$  poly(I:C)  
119 for 4 h. Then the cell lysates were separated by 15–55% sucrose density centrifugation.  
120 Fractions were blotted using the anti-RIG-I antibody. The fraction of thyroglobulin (660 kDa), a  
121 protein standard, was indicated. (e) HA-tagged ATG (ATG-HA) was co-transfected with vector  
122 or FLAG-tagged ATG (ATG-FLAG) into HEK293 cells. After 48 h, cell lysates were  
123 immunoprecipitated and blotted as indicated. (f) HA-tagged CC (CC-HA) was co-transfected  
124 with vector or FLAG-tagged CC (CC-FLAG) into HEK293 cells. After 48 h, cell lysates were  
125 immunoprecipitated and blotted as indicated. (g) FIP200-HA was co-transfected with vector,

126 FIP200-FLAG, or the indicated FIP200 mutants into HEK293 cells. After 48 h, cell lysates were  
127 immunoprecipitated and blotted as indicated. (h-i) Wild type HEK293 cells, FIP200 knockout  
128 cells, FIP200 knockout cells reconstituted with full-length FIP200 or the delCC mutant were  
129 stimulated with  $1 \mu\text{g ml}^{-1}$  poly(I:C) for designated times. Real-time PCR was performed to  
130 determine the relative mRNA levels of IP10 (h) and RANTES (i). Data represent means  $\pm$  s.d. of  
131 three independent experiments. The *P* value was calculated (two-tailed Student's *t*-test) by  
132 comparison with wild type HEK293 cells. \**P* < 0.05, \*\**P* < 0.01, \*\*\**P* < 0.001. Right panel in (h)  
133 shows the expression of FIP200 and the indicated mutant in the reconstituted cells.

134

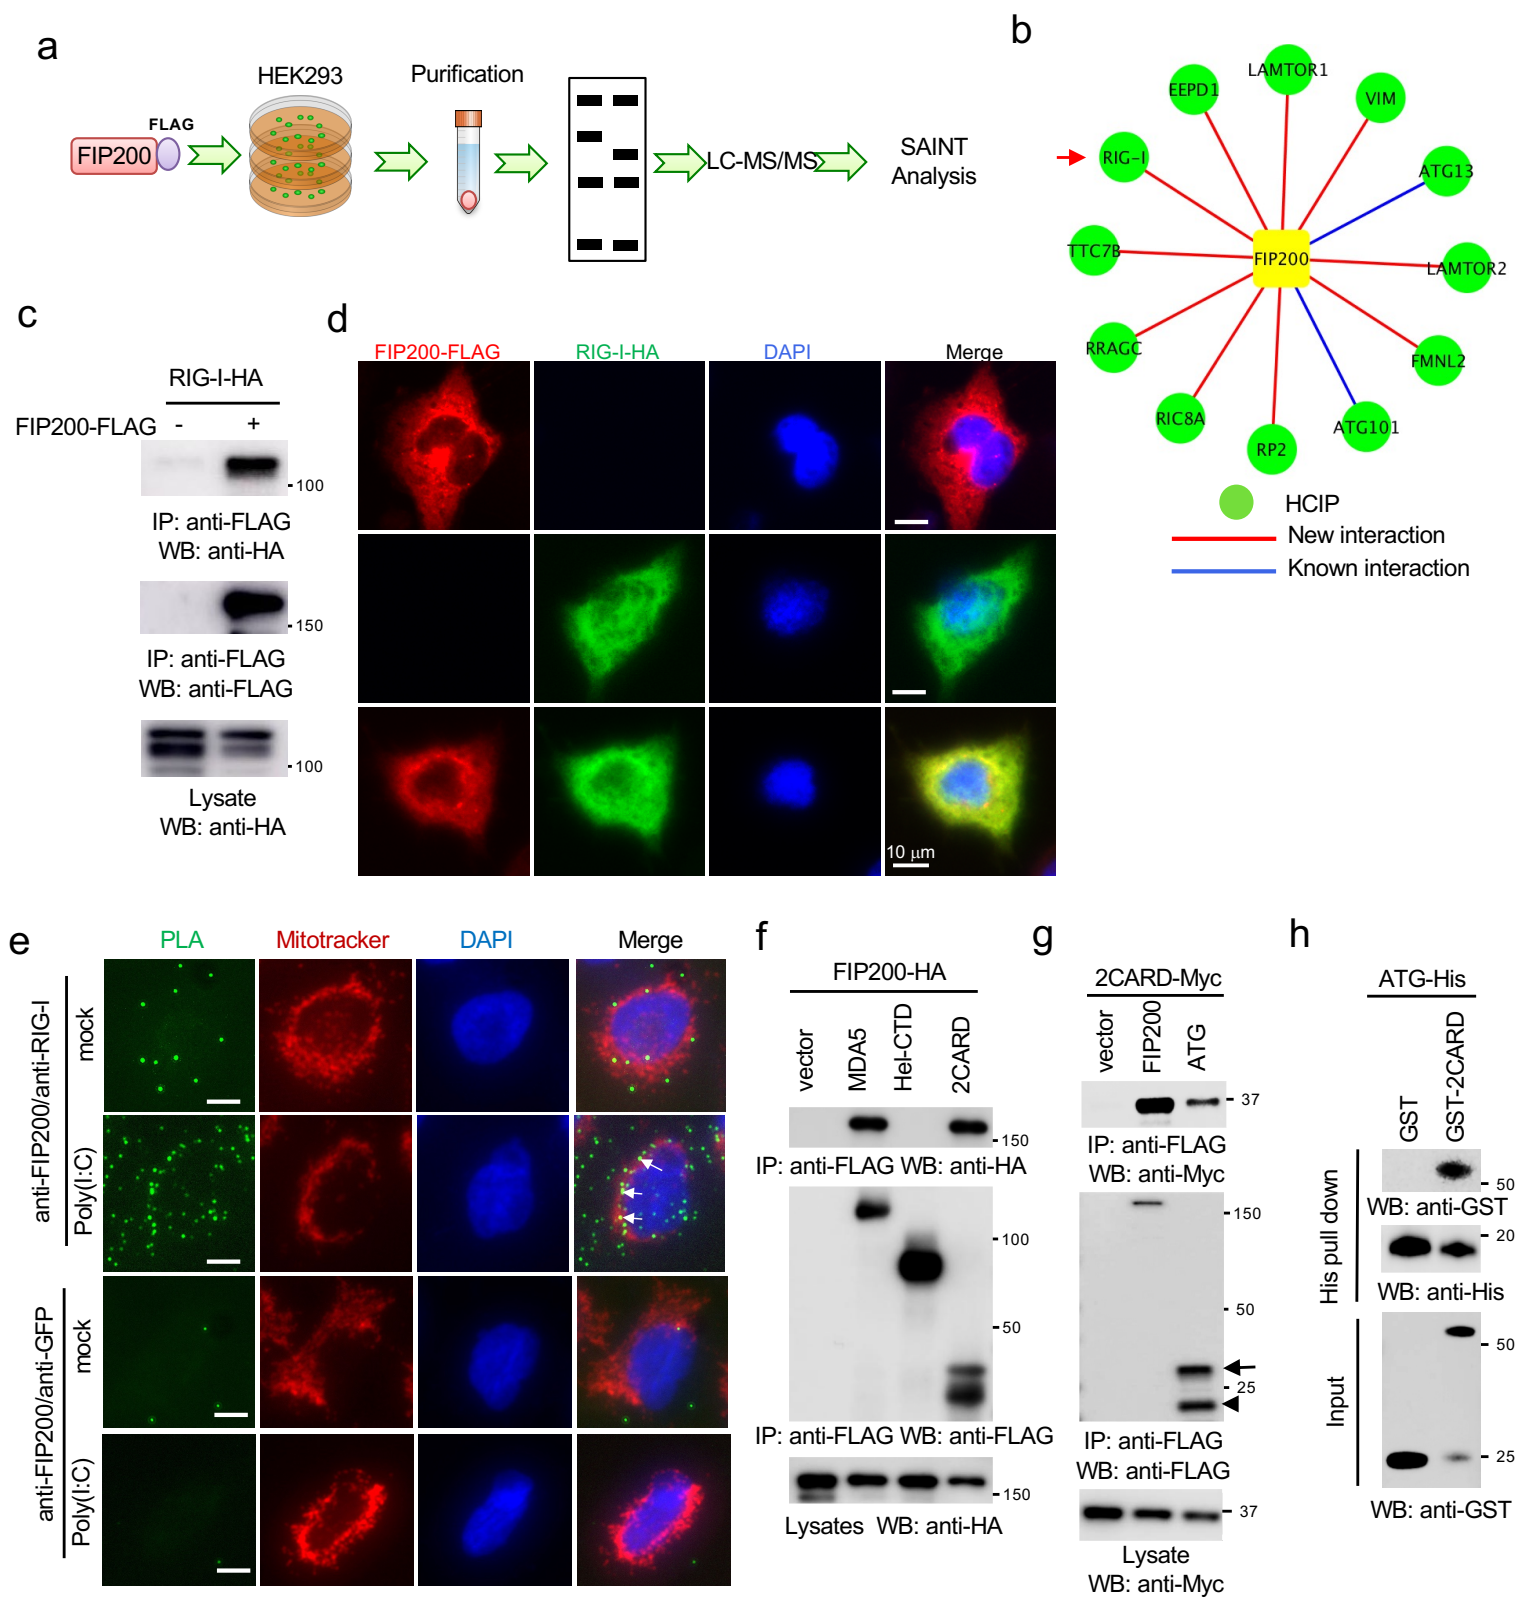

Suppl. Figure 1

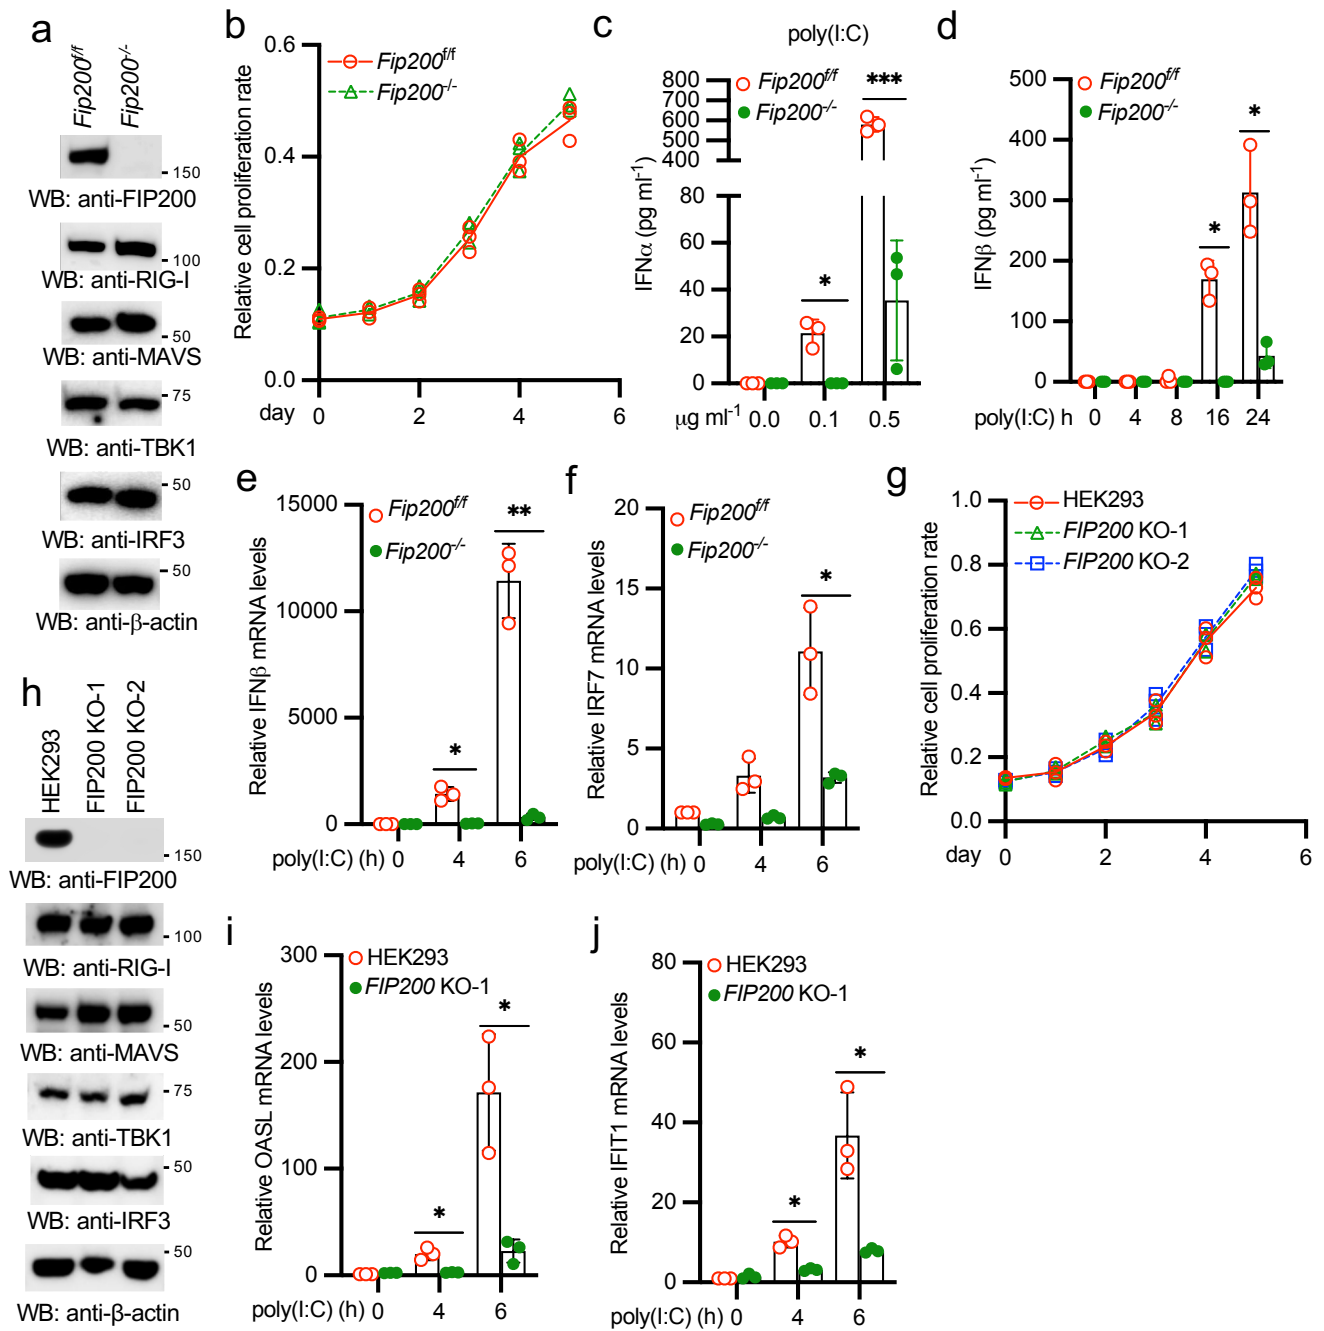

Suppl. Figure 2

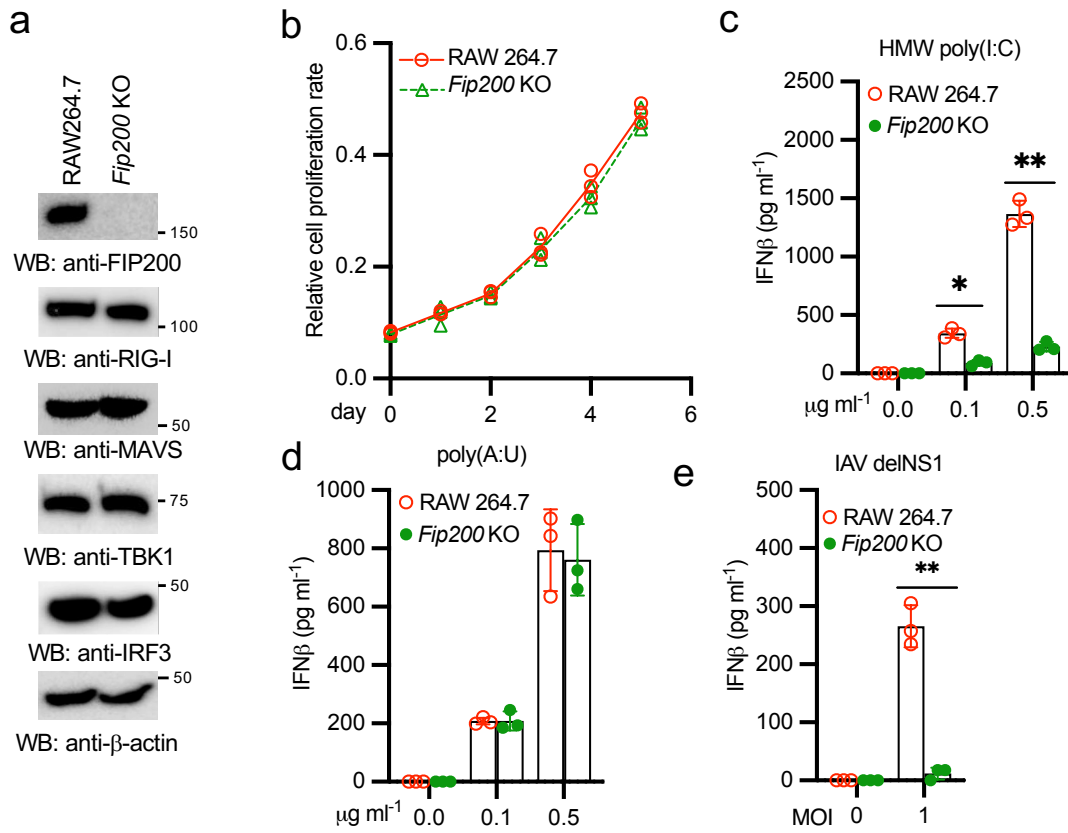

Suppl. Figure 3

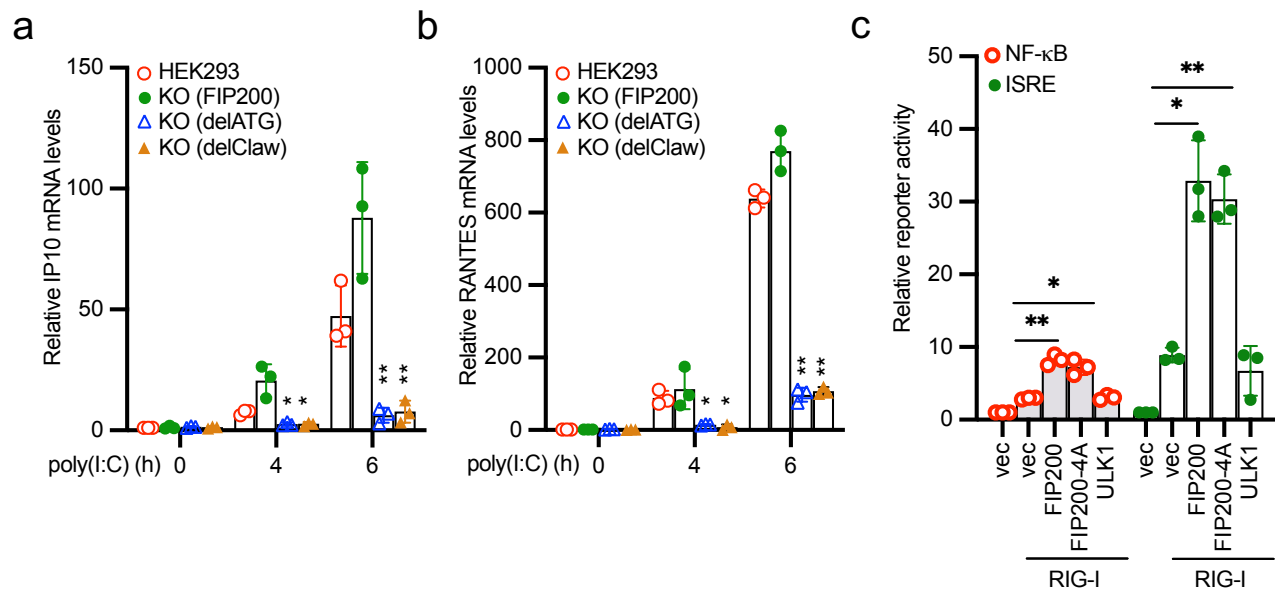

Suppl. Figure 4

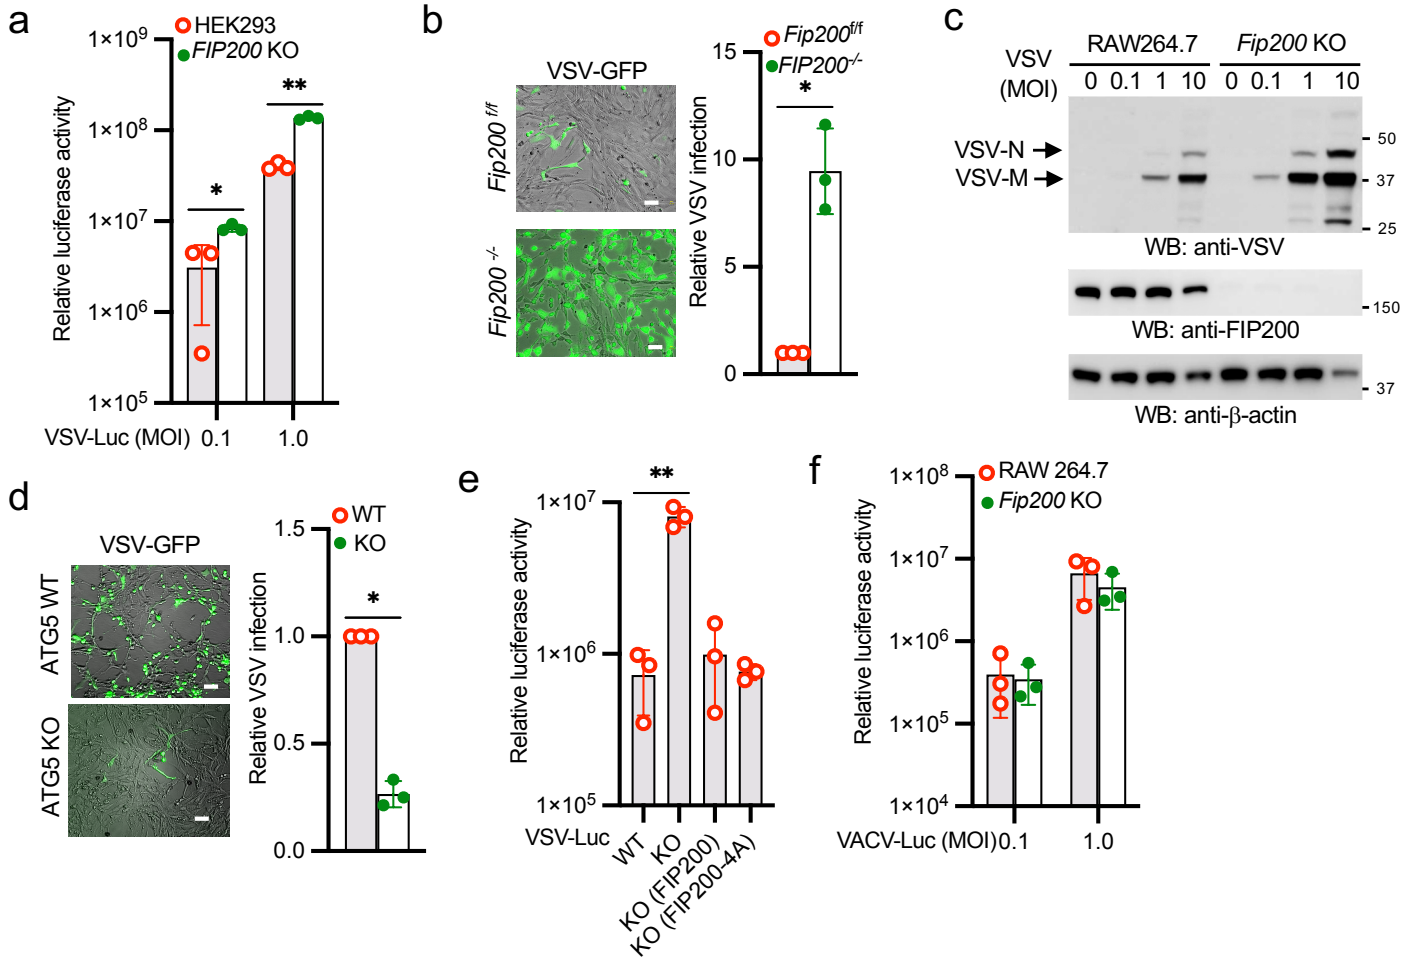

Suppl. Figure 5

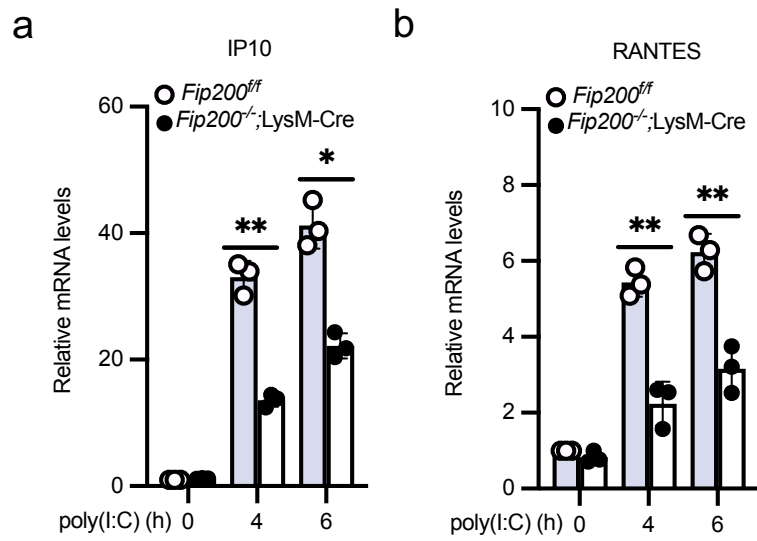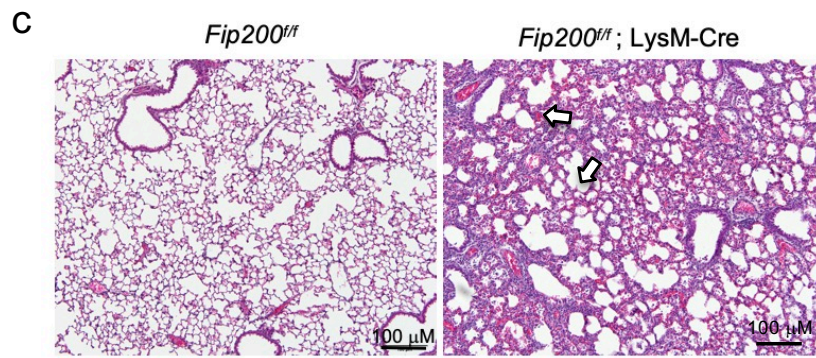

Suppl. Figure 6



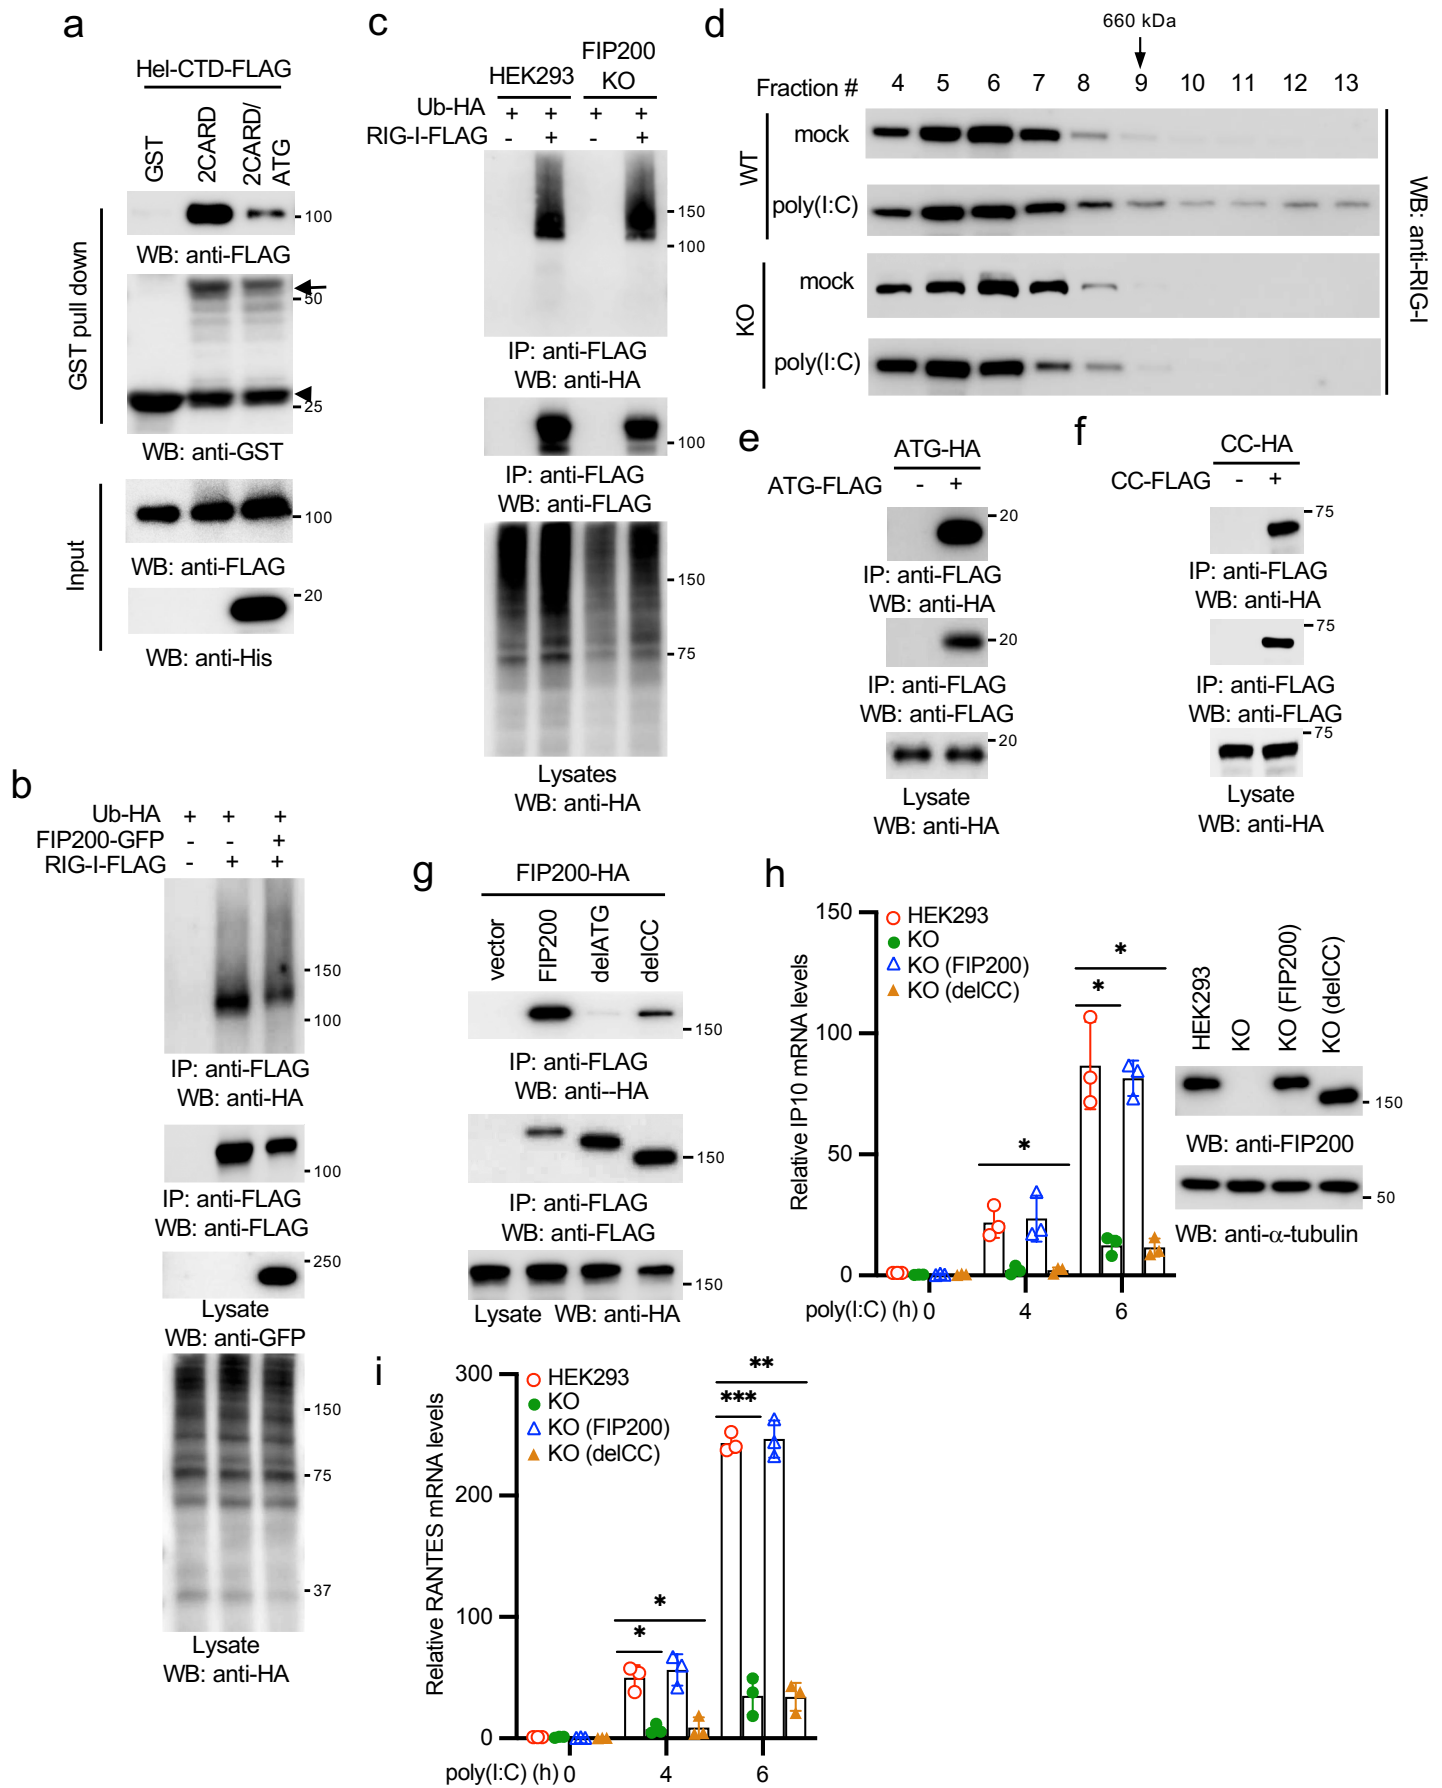

Suppl. Figure 7

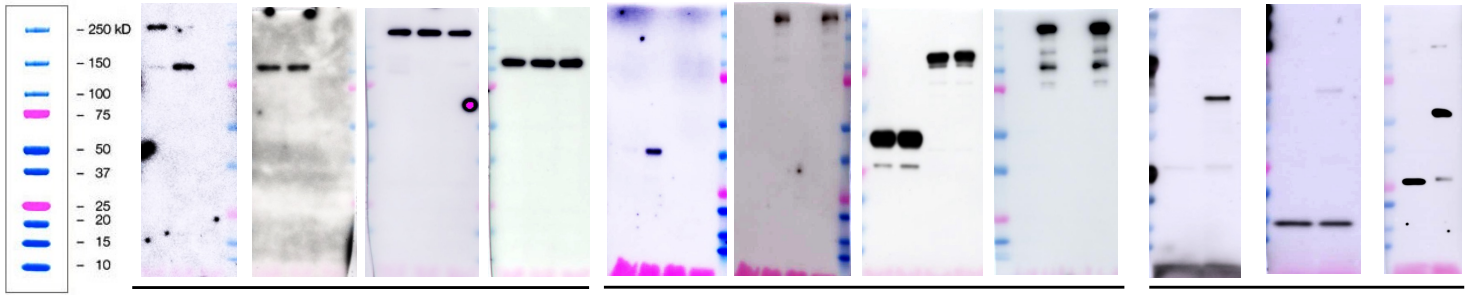

Fig. 1a

Fig. 1e

Fig. 1k

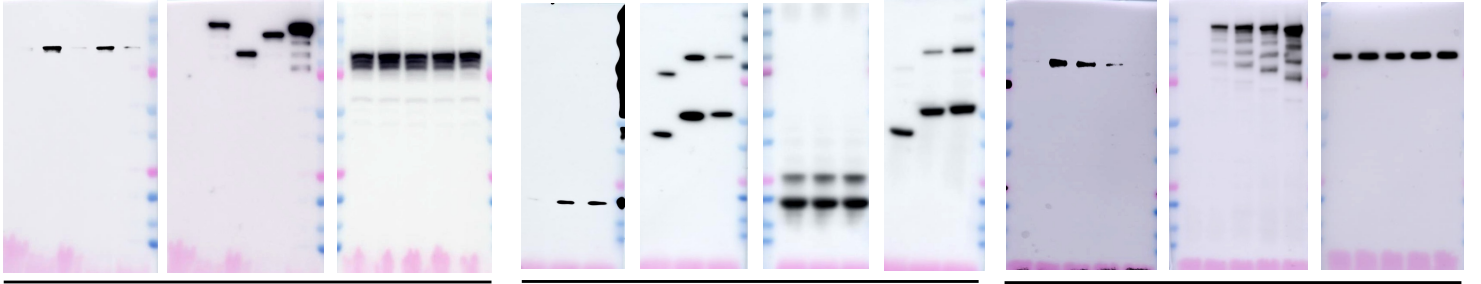

Fig. 1g

Fig. 1h

Fig. 1j

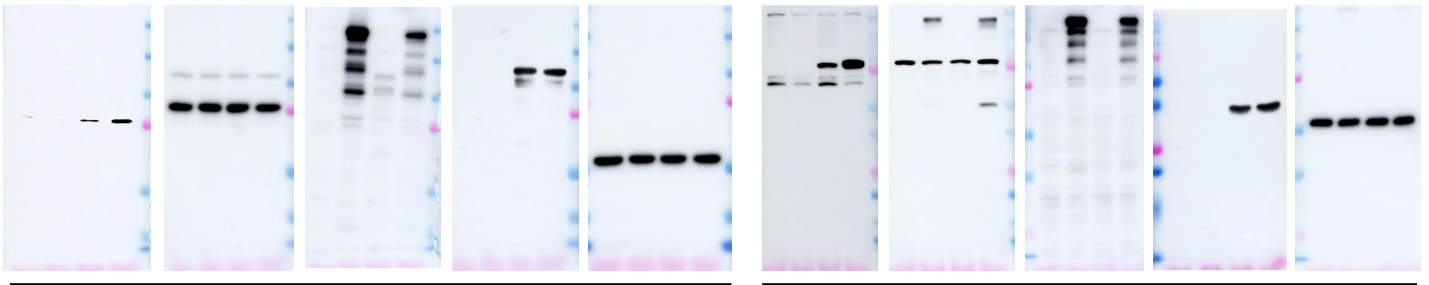

Fig. 2c

Fig. 2f

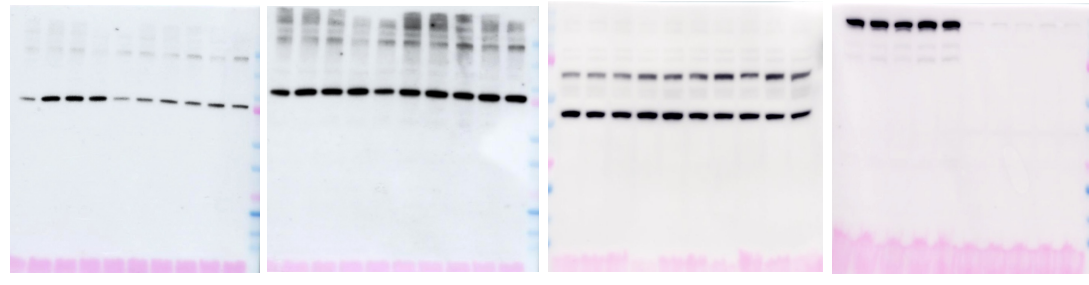

Fig. 3m

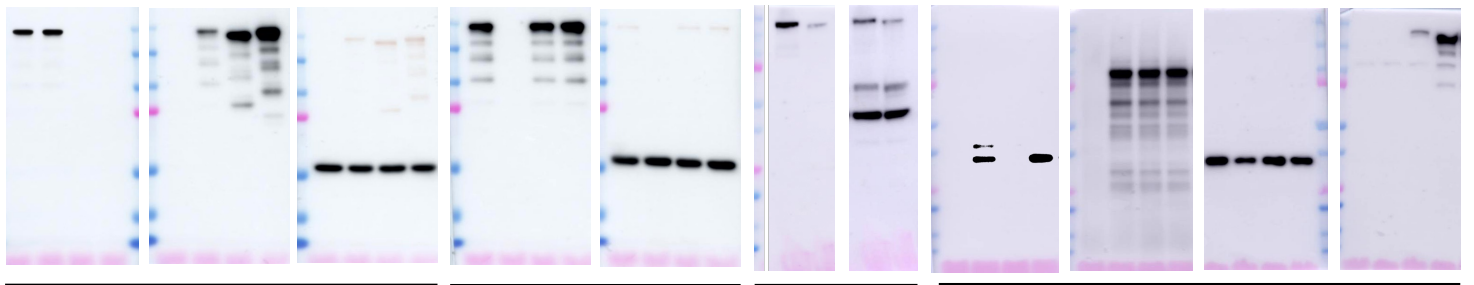

Fig. 5b

Fig. 5d

Fig. 7a

Fig. 8a

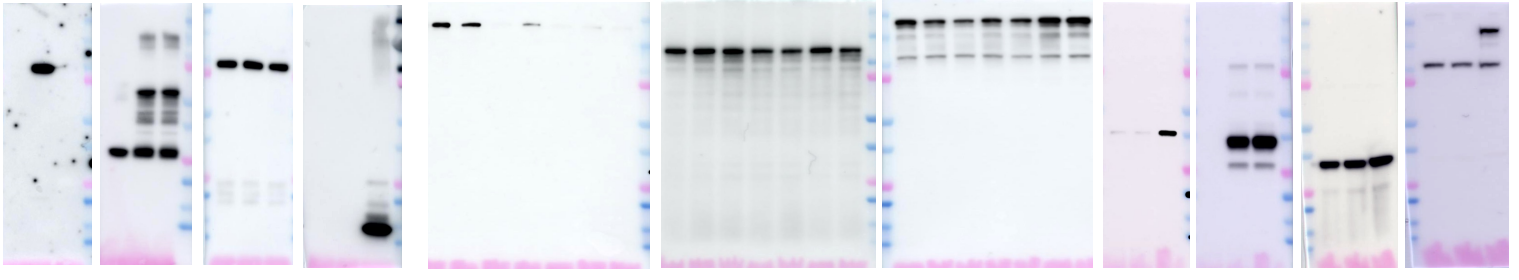

Fig. 8b

Fig. 8c

Fig. 8d

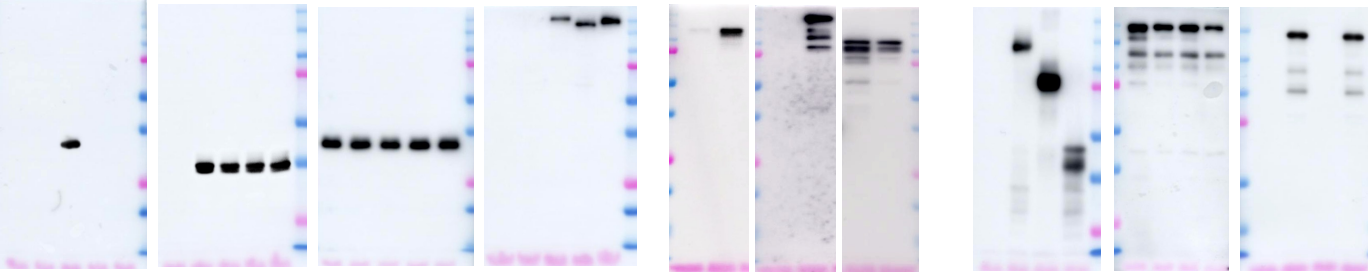

Fig. 8e

Suppl. Fig. 1c

Suppl. Fig. 1f

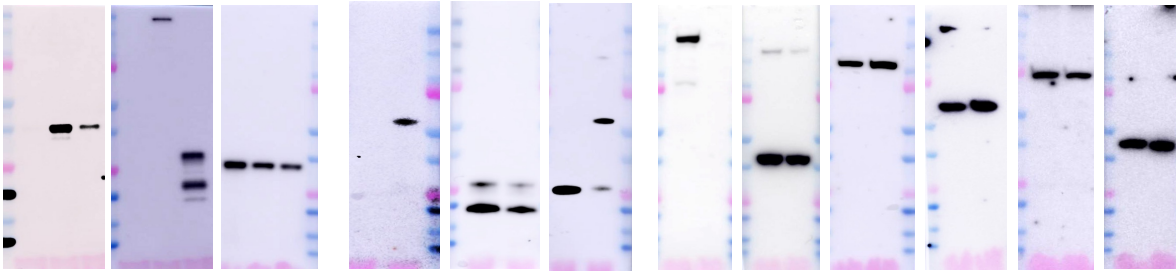

Suppl. Fig. 1g

Suppl. Fig. 1h

Suppl. Fig. 2a

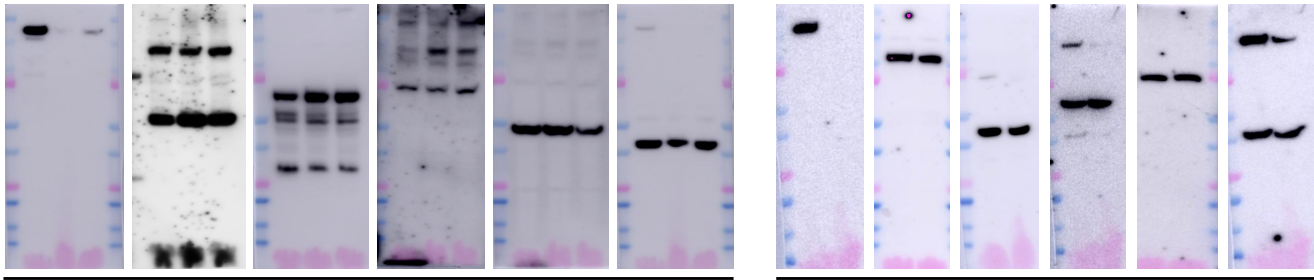

Suppl. Fig. 2h

Suppl. Fig. 3a

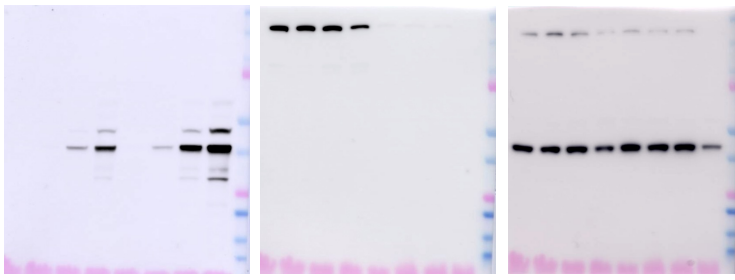

Suppl. Fig. 5c

Suppl. Figure 9

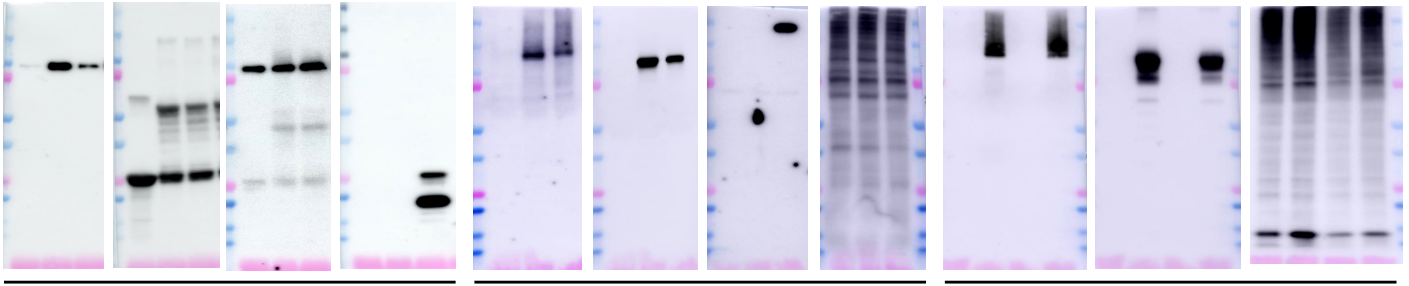

Suppl. Fig. 7a

Suppl. Fig. 7b

Suppl. Fig. 7c

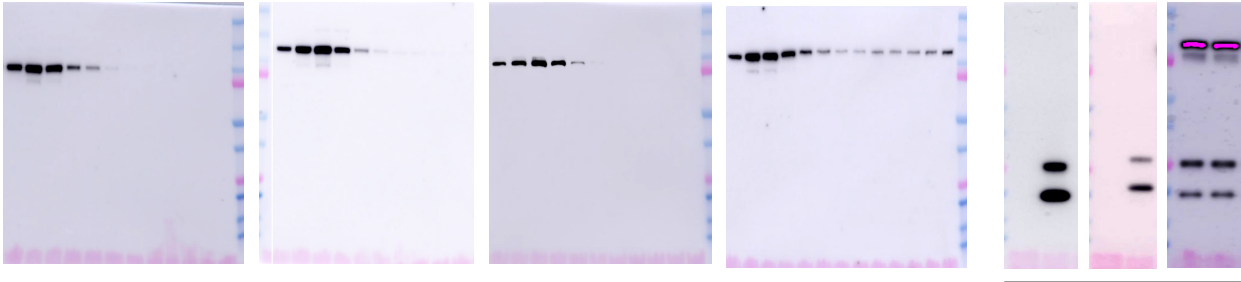

Suppl. Fig. 7d

Suppl. Fig. 7e

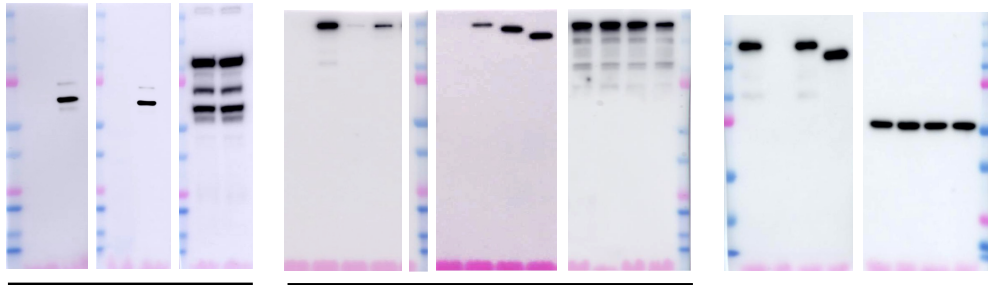

Suppl. Fig. 7f

Suppl. Fig. 7g

Suppl. Fig. 7h
