# Supplementary material for: FIP200 restricts RNA virus infection by facilitating RIG-I activation
Source: PubMed Central journal article supplement (PMC8322336; doi:10.1038/s42003-021-02450-1), 2021-07-29
Supplement: 42003_2021_2450_MOESM3_ESM.pdf [file 42003_2021_2450_MOESM3_ESM.pdf]

## Description of Additional Supplementary Files

**File name:** Supplementary Data 1

**Description:** The complete mass spectrometry data of FIP200 protein complex.

**File name:** Supplementary Data 2

**Description:** All source data for Figures.
